# Supplementary material
Source: Springer Nature journal article supplement (https://www.springermedizin.de/resource/supplementary/13012_2009_254_MOESM4_ESM.pdf/9629566)

**Level 2 – Pool-level characteristics**

Pool characteristics

Treatment group

**Level 1 – Lifeguard-level characteristics**

Lifeguard background characteristics

Lifeguard sun protective attitudes

Lifeguard sun protective behaviors

Implementation of Pool Cool by lifeguards

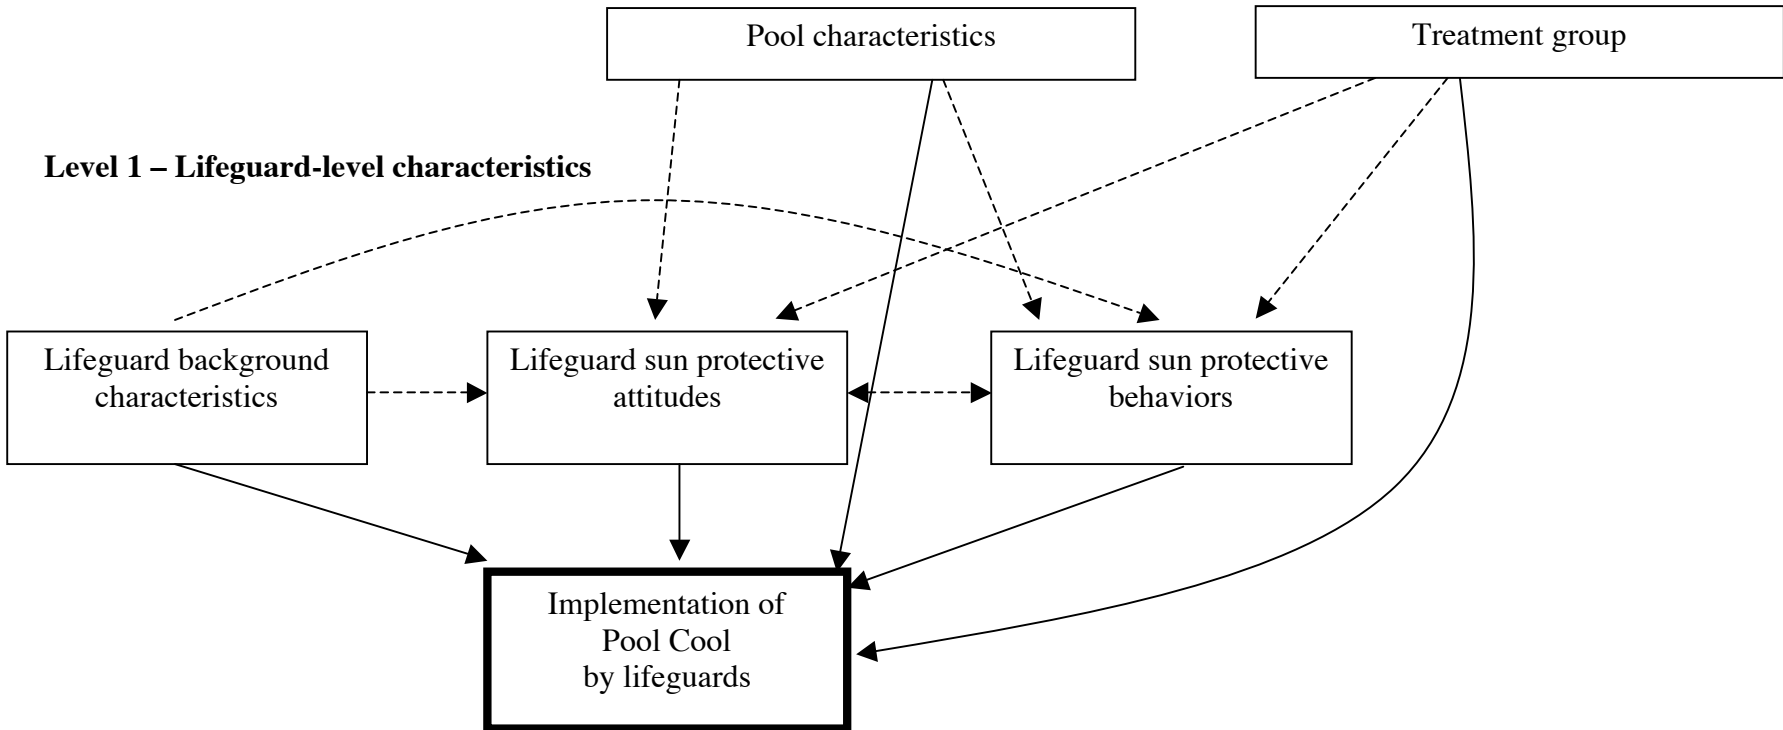

Supplement: MOESM4 [file 9629566]
